# Supplementary material for: Identifying Parameters for Defining “Essentially Derived Varieties” of Maize Inbred Lines Using High-Throughput Genome-Wide SNP Markers
Source: MDPI journal article supplement (doi:10.3390/plants11151909), 2022-07-23
Supplement: s1 [file s1]

**Underling Fundamental Parameters for Defining Maize Essentially-Derived-Varieties of  
Inbreds Using High Throughput Genome-wide SNP Markers**

**Supplemental Table S1. Accessions of maize inbreds used in this study.**

| <b>NO</b> | <b>Inbreds ID</b> | <b>Inbred full name</b> | <b>Seed bank ID</b> | <b>Year</b> | <b>Inbred accessions</b> |
|-----------|-------------------|-------------------------|---------------------|-------------|--------------------------|
| <b>1</b>  | <b>HZ4</b>        | Huangzao4               | 09229-2             | 2009        | HZ4_2009                 |
|           | <b>HZ4</b>        | Huangzao4               | 16-8487-1           | 2016        | HZ4_2016.1               |
|           | <b>HZ4</b>        | Huangzao4               | 160051              | 2016        | HZ4_2016.2               |
| <b>2</b>  | <b>Zi330</b>      | Zi330                   | 15-5337             | 2015        | Zi330_2015               |
|           | <b>Zi330</b>      | Zi330                   | 17030               | 2017        | Zi330_2017               |
| <b>3</b>  | <b>Ji853</b>      | Ji853                   | 160021              | 2016        | Ji853_2016.1             |
|           | <b>Ji853</b>      | Ji853                   | 16-8489             | 2016        | Ji853_2016.2             |
| <b>4</b>  | <b>JiK853</b>     | JiK853                  | 5174                | 2015        | JiK853                   |
| <b>5</b>  | <b>A619Ht</b>     | A619Ht                  | 120217              | 2012        | A619Ht                   |
| <b>6</b>  | <b>A619</b>       | A619                    | 120298              | 2012        | A619                     |
| <b>7</b>  | <b>444</b>        | 444                     | IN91                | 2012        | 444_2012                 |
|           | <b>444</b>        | 444                     | 160122              | 2016        | 444_2016                 |
| <b>8</b>  | <b>B467</b>       | B467                    | N2                  | 2008        | B467                     |
| <b>9</b>  | <b>JiV057</b>     | JiV057                  | 16-8482-2           | 2016        | JiV057                   |
| <b>10</b> | <b>Jin03</b>      | Jin03                   | 120231-2            | 2012        | Jin03_2012               |
|           | <b>Jin03</b>      | Jin03                   | 160131              | 2016        | Jin03_2016               |
| <b>11</b> | <b>Si287</b>      | Si287                   | N7                  | 2008        | Si287                    |
| <b>12</b> | <b>DH02</b>       | Danhuang02              | 110121              | 2011        | DH02_2011                |
|           | <b>DH02</b>       | Danhuang02              | 160002              | 2016        | DH02_2016                |
| <b>13</b> | <b>J9206</b>      | J9206                   | 16-8506             | 2016        | J9206                    |
| <b>14</b> | <b>Ji1037</b>     | Ji1037                  | N40                 | 2008        | Ji1037                   |
| <b>15</b> | <b>JiK287</b>     | JiK287                  | 5057                | 2015        | JiK287                   |
| <b>16</b> | <b>L269</b>       | L269                    | 16*5014             | 2016        | L269                     |
| <b>17</b> | <b>S1014</b>      | S1014                   | 17S1014             | 2017        | S1014                    |
| <b>18</b> | <b>PHP02</b>      | PHP02                   | 14*1574             | 2014        | PHP02                    |
| <b>19</b> | <b>S2024</b>      | S2024                   | 17S2024             | 2017        | S2024                    |
| <b>20</b> | <b>Si273</b>      | Si273                   | N27                 | 2008        | Si273                    |
| <b>21</b> | <b>JiA3301</b>    | JiA3301                 | 17*1003             | 2017        | 2455                     |

**Supplemental Table S2. The incomplete official data on hybrids and their growing area as analyzed inbred as parental lines.**

| No | Inbreds               | Hybrids used as parental lines       | Accumulative Growing Area (ha.) |
|----|-----------------------|--------------------------------------|---------------------------------|
| 1  | <b>Huangzao4(HZ4)</b> | Jingzao7 (Huangzao4 × Luoxi3)        | 1,945,333                       |
| 2  |                       | Yandan14 (Huangzao4 × MO17)          | 10,401,333                      |
| 3  |                       | Hudan1 (Huangzao4 × MO17)            | 3,392,667                       |
| 4  |                       | Huang417 (Huangzao4 × MO17)          | 2,792,667                       |
| 5  |                       | Handan15 (Huangzao4 × Santuan)       | 123,333                         |
| 6  |                       | Yedan2 (Ye107 × Huangzao4)           | 18,003,333                      |
| 7  |                       | Liaoyu5 (Yuanwu02 × Huangzao4)       | 2,647,333                       |
| 8  |                       | Lainongsi (Huangzao4 × 1029)         | 70,000                          |
| 9  |                       | Luyuandan8 (Yuanqi123 × Huangzao4)   | 745,333                         |
| 10 |                       | Yedan4 (U8112 × Huangzao4)           | 7,210,667                       |
| 11 |                       | Ludan39 (Huaiai141 × Huangzao4)      | 180,667                         |
| 12 |                       | Shangdan3 (27-263 × Huangzao4)       | 175,333                         |
| 13 |                       | Zhengdan8 (Huangzao4 × Zheng32)      | 396,000                         |
| 14 |                       | Yudan8 (Huangzao4 × 3184)            | 30,667                          |
| 15 |                       | Handan2 (Huangzao4 × Huobai)         | 648,667                         |
| 16 |                       | Langyu2 (Zigai1 × Huangzao4)         | 284,000                         |
| 17 |                       | Xingdan1 (Huangzao4 × Xing11)        | 72,000                          |
| 18 |                       | Hengdan8 (Huangzao4 × CB5)           | 40,000                          |
| 19 |                       | 81159 (29028 × Huangzao4)            | 121,333                         |
| 20 |                       | Jiyu1 (Huangzao4 × Ji21)             | 34,000                          |
| 21 |                       | Henong207 (Ai192 × Huangzao4)        | 36,000                          |
| 22 |                       | Jidan25 (Ping21 × Huangzao4)         | 8,667                           |
| 23 |                       | Suyu1 (Su80-1 × Huangzao4)           | 813,333                         |
| 24 |                       | Hudan5 (150 × Huangzao4)             | 14,000                          |
| 25 |                       | Tongdan26 (Yan4084 × Huangzao4)      | 90,667                          |
| 26 |                       | Zhongyuandan4 (Yuanfu17 × Huangzao4) | 164,667                         |
| 27 |                       | Jidan122 (B73 × Huangzao4)           | 10,000                          |
| 28 | <b>Zi330</b>          | Zhongdan2 (Mo17 × Zi330)             | 30,331,333                      |
| 29 |                       | Danyu6 (Lv28 × Zi330)                | 2,336,000                       |
| 30 |                       | Qisandanjiao (77 × Zi330)            | 1,584,667                       |
| 31 |                       | Jingza6 (Zi330 × Xu052)              | 2,821,333                       |
| 32 | <b>Ji853</b>          | Tiedan4 (Ji63 × Zi330)               | 2,766,000                       |
| 33 |                       | Shendan3 (Baihe43 × Zi330)           | 822,667                         |
| 34 |                       | Jidan180 (Ji853 × M017)              | 2,088,000                       |
| 35 |                       | Jidan342 (Ji1037 × Ji853)            | 199,333                         |
| 36 | <b>Ji853</b>          | Tongji100 (C8605-2 × Ji853)          | 375,333                         |
| 37 |                       | Jidan261 (W9706 × Ji853)             | 352,667                         |
| 38 |                       | Jidan517 (JiV022 × Ji853)            | 586,667                         |
| 39 |                       | Jingke25 (J0045 × Ji853)             | 70,000                          |
| 40 |                       | Liaodan33 (Liao3180 × Ji853)         | 122,667                         |
| 41 |                       | Chengyu14 (Chengxi14 × Ji853)        | 20,667                          |
| 42 |                       | Nongdakemao518 (JND2361 × Ji853)     | 16,000                          |
| 43 |                       | Qinji53 (Qin3 × Ji853)               | unavailable                     |
| 44 |                       | Chengyu10 (Chengxi24 × Ji853)        | 16,667                          |
| 45 |                       | Leiao1 (L4005 × Ji853)               | unavailable                     |
| 46 |                       | Zeyu17 (L0745 × Ji853)               | unavailable                     |

|    |                                 |             |
|----|---------------------------------|-------------|
| 47 | Jiaer336 (E221 × Ji853)         | 57,333      |
| 48 | Liaodan129 (Liao8160 × Ji853)   | unavailable |
| 49 | Fuyou99 (C7112 × Ji853)         | 80,667      |
| 50 | Zhongke2 (CT141 × Ji853)        | unavailable |
| 51 | Jingke8 (Ji853 × P007)          | 8,667       |
| 52 | Zhongdan18 (Ji853 × Zhong4875)  | unavailable |
| 53 | Chengyu5 (1154 × Ji853)         | 270,667     |
| 54 | Jidan303 (7884-7Ht × Ji853)     | unavailable |
| 55 | Jidan209 (8902 × Ji853)         | 850,000     |
| 56 | Jidan321 (Ji921 × Ji853)        | 126,667     |
| 57 | Sidan111 (C8605 × Ji853)        | unavailable |
| 58 | Jidan325 (Ji930 × Ji853)        | unavailable |
| 59 | Jidan257 (1079-6 × Ji853)       | 65,333      |
| 60 | Jidan413 (9681533 × Ji853)      | unavailable |
| 61 | Jidan515 (JiB93-4 × Ji853)      | unavailable |
| 62 | Jidan264 (2029 × Ji853)         | 6,667       |
| 63 | Jidan35 (A-394 × Ji853)         | 76,000      |
| 64 | Jidan711 (Ji9-033 × Ji853)      | unavailable |
| 65 | Chengyu5 (ZaC546 × Ji853)       | 18,000      |
| 66 | Tongyu98 (LH1 × Ji853)          | 8,667       |
| 67 | Jixin203 (Ji853 × 9046)         | 128,667     |
| 68 | Jixin205 (Ji853 × LH51)         | 27,333      |
| 69 | Yifeng10 (M121 × Ji853)         | 134,667     |
| 70 | Longfeng2 (241 × Ji853)         | 99,333      |
| 71 | Jundan8 (Jun8903 × Ji853)       | 136,667     |
| 72 | Zhengda988 (C7112 × Ji853)      | unavailable |
| 73 | Xinchun18 (Ji853 × 462)         | 58,000      |
| 74 | Jiuyu27 (98114 × Ji853)         | 9,333       |
| 75 | Zeyu11 (H011 × Ji853)           | 68,667      |
| 76 | Chunyu8 (C4641 × Ji853)         | unavailable |
| 77 | Tongyu99 (LH3 × Ji853)          | 38,667      |
| 78 | Gongzhu1 (Ji853 × HN1)          | unavailable |
| 79 | Tunyu58 (MH251 × Ji853)         | unavailable |
| 80 | Jiyu301 (GS01 × Ji853)          | 55,333      |
| 81 | Denghai6145 (S44625 × Ji853)    | unavailable |
| 82 | Jidong8 (Ji853 × S20)           | 8,000       |
| 83 | Jiangyu417 (3115 × Ji853)       | unavailable |
| 84 | Hongyu29 (W9813 × Ji853)        | 218,667     |
| 85 | Jixin308 (Xin343 × Ji853)       | unavailable |
| 86 | Tongyu112 (A67 × 853)           | unavailable |
| 87 | Qindan4 (Ji853 × Qinxi421)      | 212,000     |
| 88 | Danyu404 (H185 × Ji853)         | unavailable |
| 89 | Shuanghe1 (D3011 × Ji853)       | unavailable |
| 90 | Jinyu61 (T8918 × Ji853)         | unavailable |
| 91 | Jinshan8 (Jin103 × Ji853)       | unavailable |
| 92 | <b>444</b> Sidan19 (444 × MO17) | 10,709,333  |
| 93 | Sizao154 (444 × D801)           | unavailable |
| 94 | Jidan501 (444 × 351)            | 8,000       |
| 95 | Jidan252 (444 × J001)           | unavailable |
| 96 | Jidan507 (444 × Ji1037)         | unavailable |
| 97 | Baizao2 (444 × Baiyin896)       | unavailable |

|              |                         |                                |                    |
|--------------|-------------------------|--------------------------------|--------------------|
| 98           |                         | Haoyu19 (444 × Mmei78)         | 6,667              |
| 99           |                         | Baidan52 (444 × Bai256)        | unavailable        |
| 100          |                         | Jidan262 (444 × W9706)         | unavailable        |
| 101          |                         | Jiudan57 (444 × 1216)          | 6,667              |
| 102          |                         | Longfeng7 (444 × 241)          | 28,667             |
| 103          |                         | Changdan529 (444 × WM05)       | 18,000             |
| 104          |                         | Jidong31 (444 × D20)           | unavailable        |
| 105          |                         | Jiudan12 (444 × M3)            | 28,667             |
| 106          |                         | Tiedan13 (444 × C8605-2)       | 13,333             |
| 107          |                         | Xingdan6 (444 × Hu150)         | unavailable        |
| 108          |                         | Jinshan10 (444 × Jinshan1013)  | 6,667              |
| 109          |                         | Kehe10 (444 × Ba816)           | unavailable        |
| 110          |                         | Jidan507 (444 × Ji1037)        | unavailable        |
| 111          | <b>B467</b>             | Jidan103 (B467 × He344)        | 58,667             |
| 112          | <b>Si287</b>            | Jidan27 (Si-287 × Si-144)      | 1,882,667          |
| 113          |                         | Jidan32 (Si-287 × Hu150)       | 126,667            |
| 114          |                         | Jidan92 (Si-287 × Ji1037)      | unavailable        |
| 115          |                         | Jidan18 (Si-287 × JiA034)      | unavailable        |
| 116          |                         | Jidong16 (Si-287 × D22)        | 72,000             |
| 117          | <b>DH02(Danhuang02)</b> | Danyu16 (5003 × Danhuang02)    | 496,000            |
| 118          | <b>J9206</b>            | Jidan137 (C8605 × J9206)       | 118,667            |
| 119          | <b>Ji1037</b>           | Jidan342 (Ji1037 × Ji853)      | 199,333            |
| 120          |                         | Jidan507 (Si-444 × Ji1037)     | unavailable        |
| 121          |                         | Jidan618 (Ji1037 × JiD850)     | unavailable        |
| 122          |                         | Jidan92 (Si-287 × Ji1037)      | unavailable        |
| 123          |                         | Jidan419 (Ji1037 × Ji96815-33) | unavailable        |
| 124          | <b>JiK287</b>           | Jidan502 (JiK287 × JiV022)     | unavailable        |
| 125          | <b>L269</b>             | Limin33 (L201 × L269)          | 215,333            |
| 126          | <b>JIA3301(2455)</b>    | Jidan33 (JiA3301 × JiA3302)    | unavailable        |
| 127          | <b>Si273</b>            | Jidan271 (Si-273 × 673)        | unavailable        |
| 128          |                         | Jidan29 (Si-273 × 599-20-1)    | 99,333             |
| 129          | <b>434</b>              | Sizao121 (434 × C52)           | unavailable        |
| 130          |                         | Sizao6 (434 × 4F1)             | 622,000            |
| 131          | <b>JiV057</b>           | Jidan550 (JiV079 × JiV057)     | unavailable        |
| <b>Total</b> |                         |                                | <b>112,442,667</b> |

**Note: Official data on growing area of each hybrids were publicly available.**

<http://202.127.42.47:6006/home>

**Supplemental Table S3. The number of SNP applied into analysis.**

| Inbred accessions | NO. of SNP using into analysis after filtering |       |                                                                                                        |
|-------------------|------------------------------------------------|-------|--------------------------------------------------------------------------------------------------------|
|                   | RH                                             | GD    | EDV                                                                                                    |
| HZ4_2009          | 35593                                          | —     | —                                                                                                      |
| HZ4_2016.1        | 35629                                          | 35588 | 13068 <sup>a</sup> , 13092 <sup>b</sup>                                                                |
| HZ4_2016.2        | 35617                                          | 35588 | —                                                                                                      |
| Zi330_2015        | 35601                                          | 35575 | —                                                                                                      |
| Zi330_2017        | 35616                                          | 35575 | 13068 <sup>a</sup>                                                                                     |
| Ji853_2016.1      | 35590                                          | 35555 | —                                                                                                      |
| Ji853_2016.2      | 35592                                          | 35555 | 13771 <sup>c</sup> , 13068 <sup>a</sup>                                                                |
| JiK853            | 35586                                          | —     | 13771 <sup>c</sup>                                                                                     |
| A619Ht            | 35604                                          | 35534 | 13092 <sup>b</sup>                                                                                     |
| A619              | 35571                                          | 35534 | —                                                                                                      |
| 444_2012          | 35544                                          | 35444 | —                                                                                                      |
| 444_2016          | 35549                                          | 35444 | 13092 <sup>b</sup> , 12119 <sup>d</sup> , 11300 <sup>e</sup> , 34638 <sup>f</sup> , 34527 <sup>g</sup> |
| B467              | 35501                                          | —     | 34527 <sup>g</sup>                                                                                     |
| JiV057            | 35546                                          | —     | 34638 <sup>f</sup>                                                                                     |
| Jin03_2012        | 35462                                          | 35430 | —                                                                                                      |
| Jin03_2016        | 35577                                          | 35430 | 12119 <sup>d</sup>                                                                                     |
| Si287             | 35543                                          | —     | 13325 <sup>h</sup> , 12119 <sup>d</sup> , 10782 <sup>i</sup> , 12681 <sup>j</sup> , 11790 <sup>k</sup> |
| DH02_2011         | 35523                                          | 35449 | —                                                                                                      |
| DH02_2016         | 35557                                          | 35449 | 11300 <sup>e</sup>                                                                                     |
| J9206             | 35466                                          | —     | 11300 <sup>e</sup>                                                                                     |
| Ji1037            | 35610                                          | —     | 13771 <sup>c</sup> , 13325 <sup>h</sup>                                                                |
| JiK287            | 35599                                          | —     | 13325 <sup>h</sup>                                                                                     |
| L269              | 35607                                          | —     | 12681 <sup>j</sup>                                                                                     |
| S1014             | 35585                                          | —     | 12681 <sup>j</sup>                                                                                     |
| PHP02             | 35627                                          | —     | 11790 <sup>k</sup>                                                                                     |
| S2024             | 35202                                          | —     | 11790 <sup>k</sup>                                                                                     |
| Si273             | 35609                                          | —     | 10782 <sup>i</sup>                                                                                     |
| JiA3301           | 35613                                          | —     | 10782 <sup>i</sup>                                                                                     |

**Note:** RH, residual heterozygosity; GD, genetic drift; EDV, essentially derived variety. The polymorphic SNPs between founder lines of EDV were used as genotyping data for inferring genome contributions.

"a" indicated the number of polymorphic SNPs between HZ4 and Zi330 used in the EDV analysis of Ji853.

"b" indicated the polymorphic SNPs numbers between HZ4 and A619Ht used in the EDV analysis of 444.

"c" indicated the number of polymorphic SNPs between Ji853 and Ji1037 used in the EDV analysis of JiK853.

"d" indicated the number of polymorphic SNPs between 444 and Jin03 used in the EDV analysis of Si287.

"e" indicated the number of polymorphic SNPs between 444 and DH02 used in the EDV analysis of J9206.

"f" indicated the number of SNPs used in the genome comparison between 444 and JiV057.

"g" indicated the number of SNPs used in the genome comparison between 444 and B467.

"h" indicated the number of polymorphic SNPs between Si287 and Ji1037 used in the EDV analysis of JiK287.

"i" indicated the number of polymorphic SNPs between Si287 and Si273 used in the EDV analysis of 2455.

"j" indicated the number of polymorphic SNPs between Si287 and L269 used in the EDV analysis of S1014.

"k" indicated the number of polymorphic SNPs between Si287 and PHP02 used in the EDV analysis of S2024.
